# Supplementary material for: Influence of Accessibility on Land Use and Landscape Pattern Based on Mapping Knowledge Domains: Review and Implications
Source: Hindawi journal article supplement (doi:10.1155/2020/7985719), 2020-07-18
Supplement: f1 [file 7985719.f1.xlsx]

## Sheet: Sheet1
NO	Title	Author	Journal	Year
1	Landscape change and the urbanization process in Europe	Antrop M	Landscape and urban planning	2004
2	Why landscapes of the past are important for the future	Antrop M	Landscape and urban planning	2005
3	A gradient analysis of urban landscape pattern: a case study from the Phoenix metropolitan region, Arizona, USA	Luck M, Wu J	Landscape ecology	2002
4	Driving forces of landscape change - current and new directions	Bürgi M, Hersperger A M	Landscape ecology	2004
5	Estimate of the area affected ecologically by the road system in the United States	Forman RTT	Conservation biology	2000
6	From roadkill to road ecology: A review of the ecological effects of roads	Coffin A W	Journal of transport Geography	2007
7	Land-cover and land-use change in a Mediterranean landscape: A spatial analysis of driving forces integrating biophysical and human factors	Serra P, Pons X, Saurí D	Applied Geography	2008
8	The ecological road-effect zone of a Massachusetts (USA) suburban highway	Forman R T T, Deblinger R D	Conservation biology	2000
9	A spatially explicit hierarchical approach to modeling complex ecological systems: theory and applications	Wu J, David J L	Ecological modelling	2002
10	Growth, population and industrialization, and urban land expansion of China	Deng X, Huang J, Rozelle S, et al	Journal of Urban Economics	2008
11	Causes of sprawl: A portrait from space	Burchfield M, Overman H G, Puga D, et al	The Quarterly Journal of Economics	2006
12	Proximate causes of land-use change in Narok District, Kenya: a spatial statistical model	Serneels S, Lambin E F	Agriculture, Ecosystems & Environment	2001
13	Modeling urban growth in Atlanta using logistic regression	Hu Z, Lo C P	Computers, Environment and Urban Systems	2007
14	Determinants of land-use change patterns in the Netherlands	Verburg P H, van Eck J R R, de Nijs T C M, et al	Environment and Planning B: Planning and Design	2004
15	Analyzing spatial restructuring of land use patterns in a fast growing region using remote sensing and GIS	Li X, Yeh A G O	Landscape and Urban planning	2004
16	Spatial and temporal dynamics of urban sprawl along two urban-rural transects: A case study of Guangzhou, China	Yu X J, Ng C N	Landscape and Urban Planning	2007
17	Urban growth pattern modeling: a case study of Wuhan city, PR China	Cheng J, Masser I	Landscape and urban planning	2003
18	Modeling urban expansion scenarios by coupling cellular automata model and system dynamic model in Beijing, China	He C, Okada N, Zhang Q, et a	Applied Geography	2006
19	Modeling spatial variations of urban growth patterns in Chinese cities: The case of Nanjing	Luo J, Wei Y H D	Landscape and urban planning	2009
20	Investigating the regional-scale pattern of agricultural land abandonment in the Swiss mountains: A spatial statistical modelling approach	Gellrich M, Zimmermann N E	Landscape and urban planning	2007
21	Selecting independent measures to quantify Melbourne's urban-rural gradient	Hahs A K, McDonnell M J	Landscape and urban planning	2006
22	Effects of roads on landscape structure within nested ecological units of the Northern Great Lakes Region, USA	Saunders S C, Mislivets M R, Chen J, et al	Biological conservation	2002
23	Spatial determinants of urban land use change in Lagos, Nigeria	Braimoh A K, Onishi T	Land Use Policy	2007
24	Accessibility as a determinant of landscape transformation in western Honduras: linking pattern and process	Nagendra H, Southworth J, Tucker C	Landscape Ecology	2003
25	Detecting and modelling spatial patterns of urban sprawl in highly fragmented areas: A case study in the Flanders-Brussels region	Poelmans L, Van Rompaey A	Landscape and urban planning	2009
26	Forty years of urban expansion in Beijing: What is the relative importance of physical, socioeconomic, and neighborhood factors?	Li X, Zhou W, Ouyang Z	Applied Geography	2013
27	The broader economic consequences of transport infrastructure investments	Lakshmanan T R	Journal of transport geography	2011
28	The impact of interactions in spatial simulation of the dynamics of urban sprawl	Fang S, Gertner G Z, Sun Z, et al	Landscape and urban planning	2005
29	A GIS-based gradient analysis of urban landscape pattern of Shanghai metropolitan area, China	Zhang L, Wu J, Zhen Y, et al	Landscape and urban planning	2004
30	Going beyond landscape change description: Quantifying the importance of driving forces of landscape change in a Central Europe case study	Hersperger A M, Bürgi M	Land Use Policy	2009
31	Measuring urban sprawl and its drivers in large Chinese cities: The case of Hangzhou	Yue W, Liu Y, Fan P	Land use policy	2013
32	Models of transportation and land use change: A guide to the territory	Iacono M, Levinson D, El-Geneidy A	Journal of Planning Literature	2008
33	Roadless space of the conterminous United States	Watts R D, Compton R W, McCammon J H, et al	Science	2007
34	Urban expansion in Centre County, Pennsylvania: Spatial dynamics and landscape transformations	Batisani N, Yarnal B	Applied Geography	2009
35	Cumulative effects of roads and logging on landscape structure in the San Juan Mountains, Colorado (USA)	McGarigal K, Romme W H, Crist M, et al	Landscape Ecology	2001
36	Spatiotemporal analysis of rural-urban land conversion	Huang B, Zhang L, Wu B	International Journal of Geographical Information Science	2009
37	Function, effects, and management of forest roads	Lugo A E, Gucinski H. Function	Forest ecology and management	2000
38	Evaluating the influence of road networks on landscape and regional ecological risk-A case study in Lancang River Valley of Southwest China	Liu S L, Cui B S, Dong S K, et al	Ecological Engineering	2008
39	Road density and landscape pattern in relation to housing density, and ownership, land cover, and soils	Hawbaker T J, Radeloff V C, Hammer R B, et al	Landscape ecology	2005
40	Multiscale characterization of land-use patterns in China	Verburg P H, Chen Y Q	Ecosystems	2000
41	Analysis of the effects of land use change on protected areas in the Philippines	Verburg P H, Overmars K P, Huigen M G A, et al	Applied Geography	2006
42	Driving forces and rates of landscape change as a promising combination for landscape change research - An application on the northern fringe of the Swiss Alps	Schneeberger N, Bürgi M, Hersperger A M, et al	Land Use Policy	2007
43	Urban growth of Kampala, Uganda: Pattern analysis and scenario development	Vermeiren K, Van Rompaey A, Loopmans M, et al	Landscape and urban planning	2012
44	Social Impacts of Transport: Literature Review and the State of the Practice of Transport Appraisal in the Netherlands and the United Kingdom	Geurs K T, Boon W, Van Wee B	Transport reviews	2009
45	The driving forces of landscape change in Europe: A systematic review of the evidence	Plieninger T, Draux H, Fagerholm N, et al	Land Use Policy	2016
46	Roads and landscape pattern in northern Wisconsin based on a comparison of four road data sources	Hawbaker T J, Radeloff V C	Conservation Biology	2004
47	Accessibility and land-use patterns at the forest fringe in the northeastern part of the Philippines	Verburg P H, Overmars K P, Witte N	Geographical Journal	2004
48	The destination of arable land in a marginal agricultural landscape in South Portugal: an exploration of land use change determinants	Van Doorn A M, Bakker M M	Landscape ecology	2007
49	Implementing landscape fragmentation as an indicator in the Swiss Monitoring System of Sustainable Development (MONET)	Jaeger J A G, Bertiller R, Schwick C, et al	Journal of environmental management	2008
50	Road development, housing growth, and landscape fragmentation in northern Wisconsin: 1937-1999	Hawbaker T J, Radeloff V C, Clayton M K, et al	Ecological Applications	2006
51	Effects of roads, topography, and land use on forest cover dynamics in the Brazilian Atlantic Forest	Freitas S R, Hawbaker T J, Metzger J P	Forest Ecology and Management	2010
52	The reshaping of land use and urban form in Denver through transit-oriented development	Ratner K A, Goetz A R	Cities	2013
53	Land use change and its driving forces on the Tibetan Plateau during 1990-2000	Wang X, Zheng D, Shen Y	Catena	2008
54	Evaluation of accessibility impacts of land-use scenarios: the implications of job competition, land-use, and infrastructure developments for the Netherlands	Geurs K T, van Eck J R R	Environment and Planning B: Planning and Design	2003
55	Spatio-temporal modelling of informal settlement development in Sancaktepe district, Istanbul, Turkey	Dubovyk O, Sliuzas R, Flacke J	ISPRS Journal of Photogrammetry and Remote Sensing	2011
56	Comparing urban land expansion and its driving factors in Shenzhen and Dongguan, China	Chen J, Chang K, Karacsonyi D, et al	Habitat International	2014
57	Identifying determinants of urban growth from a multi-scale perspective: A case study of the urban agglomeration around Hangzhou Bay, China	Zhang Z, Su S, Xiao R, et al	Applied Geography	2013
58	Temporal and spatial variability of agricultural land loss in relation to policy and accessibility in a low hilly region of southeast China	Zhong T Y, Huang X J, Zhang X Y, et al	Land Use Policy	2011
59	Urban growth along motorways in Switzerland	Müller K, Steinmeier C, Küchler M	Landscape and urban Planning	2010
60	Density and dispersion: the co-development of land use and rail in London	Levinson D	Journal of Economic Geography	2008
61	A highway's road-effect zone for desert tortoises (Gopherus agassizii)	Boarman W I, Sazaki M	Journal of Arid Environments	2006
62	Forest fragmentation and landscape connectivity change associated with road network extension and city expansion: A case study in the Lancang River Valley	Liu S, Dong Y, Deng L, et al	Ecological Indicators	2014
63	Evolving subcenters: employment and population densities in Chicago, 1970-2020	McMillen D P, Lester T W	Journal of Housing Economics	2003
64	Modification of the effective mesh size for measuring landscape fragmentation to solve the boundary problem	Moser B, Jaeger J A G, Tappeiner U, et al	Landscape ecology	2007
65	Assessing the value of roadless areas in a conservation reserve strategy: biodiversity and landscape connectivity in the northern Rockies	Crist M R, Wilmer B O, Aplet G H	Journal of Applied Ecology	2005
66	Fragmentation of China's landscape by roads and urban areas	Li T, Shilling F, Thorne J, et al	Landscape Ecology	2010
67	Urban growth and its determinants across the Wuhan urban agglomeration, central China	Tan R, Liu Y, Liu Y, et al	Habitat International	2014
68	Characterizing the "fragmentation-barrier" effect of road networks on landscape connectivity: A case study in Xishuangbanna, Southwest China	Fu W, Liu S, Degloria S D, et al	Landscape and urban planning	2010
69	Impacts of road corridors on urban landscape pattern: a gradient analysis with changing grain size in Shanghai, China	Zhu M, Xu J, Jiang N, et al	Landscape ecology	2006
70	Time series of landscape fragmentation caused by transportation infrastructure and urban development: a case study from Baden-Wurttemberg, Germany	Jaeger J A G, Schwarz-von Raumer H G, Esswein H, et al	Ecology and Society	2007
71	The relationship between environmental amenities and changing human settlement patterns between 1980 and 2000 in the midwestern USA	Gustafson E J, Hammer R B, Radeloff V C, et al	Landscape Ecology	2005
72	Evaluating the Temporal and Spatial Urban Expansion Patterns of Guangzhou from 1979 to 2003 by Remote Sensing and GIS Methods	Fan F, Wang Y, Qiu M, et al	International Journal of Geographical Information Science	2009
73	Spatial-temporal analysis of urban growth and transportation in Jeddah City, Saudi Arabia	Aljoufie M, Zuidgeest M, Brussel M, et al	Cities	2013
74	Population change and accessibility by road and rail networks: GIS and statistical approach to Finland 1970-2007	Kotavaara O, Antikainen H, Rusanen J	Journal of Transport Geography	2011
75	A review of spatial-explicit factors determining spatial distribution of land use/land-use change	Mitsuda Y, Ito S	Landscape and Ecological Engineering	2011
76	From Bangalore to the Bay Area: Comparing transportation and activity accessibility as drivers of urban growth	Reilly M K, O’Mara M P, Seto K C	Landscape and urban planning	2009
77	Urban spatial structure, suburbanization and transportation in Barcelona	Garcia-López M À.	Journal of Urban Economics	2012
78	Analysis of village accessibility and its impact on land use dynamics in a mountainous province of northern Vietnam	Castella J C, Manh P H, Kam S P, et al	Applied Geography	2005
79	Peri-urban vegetated landscape pattern changes in relation to socioeconomic development	Su S, Wang Y, Luo F, et al	Ecological Indicators	2014
80	Using kernel density estimation to assess the spatial pattern of road density and its impact on landscape fragmentation	Cai X, Wu Z, Cheng J	International Journal of Geographical Information Science	2013
81	Graph theory in action: evaluating planned highway tracks based on connectivity measures	Vasas V, Magura T, Jordán F, et al	Landscape Ecology	2009
82	Longitudinal analysis of the road network development and land-cover change in Lop Buri province, Thailand, 1989-2006	Patarasuk R, Binford M W	Applied Geography	2012
83	Network Accessibility and Employment Centres	Giuliano G, Redfearn C, Agarwal A, et al	Urban Studies	2012
84	Land use/cover change and driving force analyses in parts of northern Iran using RS and GIS techniques	Kelarestaghi A, Jeloudar Z J	Arabian Journal of Geosciences	2011
85	The Impacts of Highway Expansion on Population Change: An Integrated Spatial Approach	Chi G	Rural Sociology	2010
86	An approach to differentiate informal settlements using spectral, texture, geomorphology and road accessibility metrics	Owen K K, Wong D W	Applied Geography	2013
87	Determinants of urban expansion and their relative importance: A comparative analysis of 30 major metropolitans in China	Zhang Q, Su S	Habitat International	2016
88	The intraurban spatial distribution of employment: which government interventions make a difference?	Bollinger C R, Ihlanfeldt K R	Journal of Urban Economics	2003
89	Research on the influence of site factors on the expansion of construction land in the Pearl River Delta, China: By using GIS and remote sensing	Ye Y, Zhang H, Liu K, et al	International Journal of Applied Earth Observation and Geoinformation	2013
90	Local spatial modeling of paddy soil landscape patterns in response to urbanization across the urban agglomeration around Hangzhou Bay, China	Xiao R, Su S, Wang J, et al	Applied Geography	2013
91	Integrating Mobility and Urban Development Agendas: a Manifesto	Bertolini L	disP-The Planning Review	2012
92	Analysis of landscape transformation processes in and around four West African cities over the last 50 years	Brinkmann K, Schumacher J, Dittrich A, et al	Landscape and Urban Planning	2012
93	The dual role of roads in the visual landscape: A case-study in the area around Mechelen (Belgium)	Garré S, Meeus S, Gulinck H	Landscape and Urban Planning	2009
94	Simulating urban growth processes incorporating a potential model with spatial metrics	Kong F, Yin H, Nakagoshi N, et al	Ecological Indicators	2012
95	Assessing the fragmentation of construction land in urban areas: An index method and case study in Shunde, China	Wei Y, Zhang Z	Land Use Policy	2012
96	New highways and land use change: Results from a quasi-experimental research design	Funderburg R G, Nixon H, Boarnet M G, et al	Transportation research part a: policy and practice	2010
97	Land Cover Mapping Analysis and Urban Growth Modelling Using Remote Sensing Techniques in Greater Cairo Region-Egypt	Megahed Y, Cabral P, Silva J, et al	ISPRS International Journal of Geo-Information	2015
98	Landscape fragmentation caused by the transport network in Navarra (Spain) - Two-scale analysis and landscape integration assessment	Serrano M, Sanz L, Puig J, et al	Landscape and urban planning	2002
99	Monitoring landscape fragmentation in an inaccessible mountain area: Celaque National Park, Western Honduras	Munroe D K, Nagendra H, Southworth J	Landscape and urban planning	2007
100	Land use-transport interaction modeling: A review of the literature and future research directions	Acheampong R A, Silva E A	Journal of Transport and Land use	2015
101	Successful de-fragmentation of woodland by planting in an agricultural landscape? An assessment based on landscape indicators	Quine C P, Watts K	Journal of Environmental Management	2009
102	Relating spatial pattern of forest cover to accessibility	De Clercq E M, De Wulf R, Van Herzele A	Landscape and Urban Planning	2007
103	Landuse and landscape changes in Czechia during the period of transition 1990-2007	Bičík I, Jeleček L	Geografie	2009
104	Changing and Differentiated Urban Landscape in China: Spatiotemporal Patterns and Driving Forces	Fang C, Li G, Wang S	Environmental science & technology	2016
105	Simulating Urban Growth Using the SLEUTH Model in a Coastal Peri-Urban District in China	Hua L, Tang L, Cui S, et al	Sustainability	2014
106	Underlying and proximate driving causes of land use change in district Swat, Pakistan	Qasim M, Hubacek K, Termansen M	Land use policy	2013
107	Road ecology in environmental impact assessment	Karlson M, Mörtberg U, Balfors B	Environmental impact assessment review	2014
108	Spatial Pattern of Land Use Change and Its Driving Force in Jiangsu Province	Du X, Jin X, Yang X, et al	International journal of environmental research and public health	2014
109	Modeling of urban growth in tsunami-prone city using logistic regression: Analysis of Banda Aceh, Indonesia	Achmad A, Hasyim S, Dahlan B, et al	Applied geography	2015
110	Accessibility and land use: The case of suburban Seattle, 1960-1990	Stanilov K	Regional Studies	2003
111	Impacts of Transport Infrastructure on Productivity and Economic Growth: Recent Advances and Research Challenges	Deng T	Transport Reviews	2013
112	Highway infrastructure and state-level employment: A causal spatial analysis	Jiwattanakulpaisarn P, Noland R B, Graham D J, et al	Papers in Regional Science	2009
113	Assessing highway's impacts on landscape patterns and ecosystem services: A case study in Puli Township, Taiwan	Wu C F, Lin Y P, Chiang L C, et al	Landscape and Urban Planning	2014
114	A model for assessing habitat fragmentation caused by new infrastructures in extensive territories - Evaluation of the impact of the Spanish strategic infrastructure and transport plan	Quintana S M, Ramos B M, Martínez M A C, et al	Journal of environmental management	2010
115	A spatial ecological assessment of fragmentation and disturbance effects of the Swedish road network	Karlson M, Mörtberg U	Landscape and Urban Planning	2015
116	Characterizing the fragmentation level of Italian's National Parks due to transportation infrastructures	Bruschi D, Garcia D A, Gugliermetti F, et al	Transportation Research Part D: Transport and Environment	2015
117	Urban growth models: progress and perspective	Li X, Gong P	Science bulletin	2016
118	Patterns and scale relations among urbanization measures in Stockholm, Sweden	Andersson E, Ahrné K, Pyykönen M, et al	Landscape ecology	2009
119	Modeling different urban growth patterns based on the evolution of urban form: A case study from Huangpi, Central China	Liu Y, He Q, Tan R, et al	Applied geography	2016
120	Drivers of land use/land cover changes in Munessa-Shashemene landscape of the south-central highlands of Ethiopia	Kindu M, Schneider T, Teketay D, et al	Environmental monitoring and assessment	2015
121	Landscape character assessment with GIS using map-based indicators and photographs in the relationship between landscape and roads	Martín B, Ortega E, Otero I, et al	Journal of environmental management	2016
122	Comparing urbanization patterns in Guangzhou of China and Phoenix of the USA: The influences of roads and rivers	Tian G, Wu J	Ecological indicators	2015
123	Impacts of Transportation Routes on Landscape Diversity: A Comparison of Different Route Types and Their Combined Effects	Su S, Xiao R, Li D	Environmental management	2014
124	The Impacts of Transport Accessibility on Population Change across Rural, Suburban and Urban Areas: A Case Study of Wisconsin at Sub-county Levels	Chi G	Urban studies	2012
125	A simplified model to assess landscape quality from rural roads in Spain	Ramírez Á, Ayuga-Téllez E, Gallego E, et al	Agriculture, ecosystems & environment	2011
126	Aspects influencing the selection of representative urbanization measures to quantify urban-rural gradients	Du Toit M J, Cilliers S S	Landscape Ecology	2011
127	Exploring local rural landscape changes in Denmark: A human-environmental timeline perspective	Kristensen S B P, Reenberg A, Peña J J D	Geografisk Tidsskrift-Danish Journal of Geography	2009
128	Landscape dynamics in Mediterranean oak forests under global change: understanding the role of anthropogenic and environmental drivers across forest types	Acácio V, Dias F S, Catry F X, et al	Global change biology	2017
129	Highway route optimization based on accessibility, proximity, and land-use changes	Jha M K, Kim E	Journal of transportation engineering	2006
130	Roadless areas and biodiversity: a case study in Alabama, USA	Chen X, Roberts K A	Biodiversity and Conservation	2008
131	Prioritizing highway defragmentation locations for restoring landscape connectivity	Gurrutxaga M, Saura S	Environmental conservation	2014
132	The effects of spatial accessibility and centrality to land use on walking in Seoul, Korea	Kang C D	Cities	2015
133	Designing a graph-based approach to landscape ecological assessment of linear infrastructures	Girardet X, Foltête J C, Clauzel C.	Environmental impact assessment review	2013
134	Urban land use change and regional access: A case study in Beijing, China	Deng Y, Srinivasan S	Habitat international	2016
135	Landscape liveability spatial assessment integrating ecosystem and urban services with their perceived importance by stakeholders	Antognelli S, Vizzari M	Ecological Indicators	2017
136	Evolution of the Territorial Coverage of the Railway Network and its Influence on Population Growth: The Case of England and Wales, 1871-1931	Alvarez E, Franch X, Martí-Henneberg J	Historical Methods: A Journal of Quantitative and Interdisciplinary Histor	2013
137	Transport infrastructures and employment growth in the Paris metropolitan margins	Padeiro M	Journal of Transport Geography	2013
138	Multi-city sustainable regional urban growth simulation-MSRUGS: a case study along the mid-section of Silk Road of China	Xie Y, Fan S	Stochastic environmental research and risk assessment	2014
139	Road network connectivity and land-cover dynamics in Lop Buri province, Thailand	Patarasuk R	Journal of Transport Geography	2013
140	Spatio-temporal impacts of roads on the persistence of populations: analytic and numerical approaches	Borda-de-Água L, Navarro L, Gavinhos C, et al	Landscape Ecology	2011
141	Urban growth and transport infrastructure interaction in Jeddah between 1980 and 2007	Aljoufie M, Brussel M, Zuidgeest M, et al	International journal of applied earth observation and geoinformation	2013
142	Urbanization and Transportation in Finland, 1880-1970	Kotavaara O, Antikainen H, Rusanen J	Journal of Interdisciplinary History	2011
143	Characterization and analysis of farm system changes in the Mar Chiquita basin, Argentina	Zelaya K, van Vliet J, Verburg P H	Applied Geography	2016
144	Assessing the impact of road developments on connectivity across multiple scales: Application to Yunnan snub-nosed monkey conservation	Clauzel C, Xiqing D, Gongsheng W, et al	Biological Conservation	2015
145	Assessing High-Speed Rail's impacts on land cover change in large urban areas based on spatial mixed logit methods: a case study of Madrid Atocha railway station from 1990 to 2006	Shen Y, e Silva J A, Martínez L M	Journal of Transport Geography	2014
146	Spatial History: Railways, Uneven Development, and Population Change in France and Great Britain, 1850-1914	Schwartz R, Gregory I, Thévenin T	Journal of Interdisciplinary History	2011
147	Simulating the spatial dynamics of urban growth with an integrated modeling approach: A case study of Foshan, China	Han Y, Jia H	Ecological modelling	2017
148	Road impacts on spatial patterns of land use and landscape fragmentation in three parallel rivers region, Yunnan Province, China	Liang J, Liu Y, Ying L, et al	Chinese Geographical Science	2014
149	Predicting Land Use Change How Much Does Transportation Matter?	Iacono M J, Levinson D M	Transportation research record	2009
150	A GIS-based moving window analysis of landscape pattern in the Beijing metropolitan area, China	Wu Q, Hu D, Wang R, et al	The International Journal of Sustainable Development and World Ecology	2006
151	Assessing the growth-inducing impact of the Appalachian Development Highway System in southern Ohio: Did policy promote change?	Lein J K, Day K L	Land Use Policy	2008
152	The varying driving forces of urban expansion in China: Insights from a spatial-temporal analysis	Li G, Sun S, Fang C	Landscape and Urban Planning	2018
153	Intra-city access to inter-city transport nodes: The implications of high-speed-rail station locations for the urban development of Chinese cities	Diao M, Zhu Y, Zhu J	Urban Studies	2017
154	Long-term impacts of transport infrastructure networks on land-use change: an international review of empirical studies	Kasraian D, Maat K, Stead D, et al	Transport reviews	2016
155	The socio-economic determinants of urban sprawl between 1980 and 2010 in Switzerland	Weilenmann B, Seidl I, Schulz T	Landscape and Urban Planning	2017
156	Landscape fragmentation in Romania's Southern Carpathians: Testing a European assessment with local data	Pătru-Stupariu I, Stupariu M S, Tudor C A, et al	Landscape and Urban Planning	2015
157	Quantifying the Spatiotemporal Patterns of Urbanization along Urban-Rural Gradient with a Roadscape Transect Approach: A Case Study in Shanghai, China	Zhang Z, Tu Y, Li X	Sustainability	2016
158	Impacts of road network expansion on landscape ecological risk in a megacity, China: A case study of Beijing	Mo W, Wang Y, Zhang Y, et al	Science of the Total Environment	2017
159	Spatiotemporal Variation of Driving Forces for Settlement Expansion in Different Types of Counties	Dong G, Xu E, Zhang H	Sustainability	2016
160	Impacts of fragmentation and neighbor influences on farmland conversion: A case study of the Edmonton-Calgary Corridor, Canada	Qiu F, Laliberté L, Swallow B, et al	Land Use Policy	2015
161	Spatiotemporal Modeling of Urban Growth Predictions Based on Driving Force Factors in Five Saudi Arabian Cities	Alqurashi A F, Kumar L, Al-Ghamdi K A	ISPRS International Journal of Geo-Information	2016
162	Determinants of population and jobs at a local level	Arauzo-Carod J M	The Annals of Regional Science	2007
163	Effects of road network on diversiform forest cover changes in the highest coverage region in China: An analysis of sampling strategies	Hu X, Wu Z, Wu C, et al	Science of the Total Environment	2016
164	Current and future patterns of land-use change in the coastal zone of New Jersey	Conway T M	Environment and Planning B: Planning and Design	2005
165	A Reassessment of urban structure and land-use patterns: distance to CBD or network-based? - Evidence from Chicago	Pan H, Deal B, Chen Y, et al	Regional Science and Urban Economics	2018
166	A comparison of urban growth and their influencing factors of two border cities: Laredo in the US and Nuevo Laredo in Mexico	Zhao C, Jensen J, Zhan B	Applied Geography	2017
167	Landscape changes in Norwegian mountains: Increased and decreased accessibility, and their driving forces	Eiter S, Potthoff K	Land Use Policy	2016
168	Spatiotemporal patterns of road network and road development priority in three parallel rivers region in Yunnan, China: An evaluation based on modified kernel distance estimate	Ying L, Shen Z, Chen J, et al	Chinese Geographical Science	2014
169	Driving forces of recent vegetation changes in the Sahel: Lessons learned from regional and local level analyses	Leroux L, Bégué A, Seen D L, et al	Remote Sensing of Environment	2017
170	Driving forces and their interactions of built-up land expansion based on the geographical detector - a case study of Beijing, China	Ju H, Zhang Z, Zuo L, et al	International Journal of Geographical Information Science	2016
171	Urban driving forces and megacity expansion threats. Study case in the Mexico City periphery	De la Luz Hernández-Flores M, Otazo-Sánchez E M	Habitat International	2017
172	Land use and transportation in China	Cao X	Transportation Research	2017
173	Comparison of landscape patterns between metropolises and small-sized cities: a gradient analysis with changing grain size in Shanghai and Zhangjiagang, China	Yang Q, Li J, Gan X, et al	International journal of remote sensing	2012
174	Effects of road network on vegetation pattern in Xishuangbanna, Yunnan Province, Southwest China	Liu S, Deng L, Zhao Q, et al	Transportation Research Part D: Transport and Environment	2011
175	Road centrality and landscape spatial patterns in Wuhan Metropolitan Area, China	Liu Y, Wang H, Jiao L, et al	Chinese geographical science	2015
176	Forest loss in different ecological zones of the Niger Delta, Nigeria: evidence from remote sensing	Ayanlade A, Drake N	GeoJournal	2016
177	Spatial pattern of urban functional landscapes along an urban-rural gradient: A case study in Xiamen City, China	Lin T, Sun C, Li X, et al	International journal of applied earth observation and geoinformation	2016
178	Quantifying spatio-temporal patterns of urban expansion in Beijing during 1985-2013 with rural-urban development transformation	Yang Y, Liu Y, Li Y, et al	Land Use Policy	2018
179	Modelling Land Use and Transport Policies to Measure Their Contribution to Urban Challenges: The Case of Madrid	Alonso A, Monzón A, Wang Y	Sustainability	2017
180	Spatial and temporal dynamics of shifting cultivation in the middle-Amazonas river: Expansion and intensification	Jakovac C C, Dutrieux L P, Siti L, et al	PloS one	2017
181	Railways as a Factor of Change in the Distribution of Population in Spain, 1900-1970	Franch X, Morillas-Torné M, Martí-Henneberg J	Historical Methods: A Journal of Quantitative and Interdisciplinary History	2013
182	Impacts of major vehicular roads on urban landscape and urban growth in an arid region: A case study of Jiuquan city in Gansu Province, China	Xie Y, Gong J, Sun P, et al	Journal of Arid Environments	2016
183	Impact of road network on the structure of a multifunctional forest landscape unit in southern Turkey	Eker M, Oguz Coban H	Journal of Environmental Biology	2010
184	Modelling land use changes for landscape connectivity: The role of plantation forestry and highways	Nogués S, Cabarga-Varona A	Journal for nature conservation	2014
185	Determinants of Urban Expansion and Agricultural Land Conversion in 25 EU Countries	Ustaoglu E, Williams B	Environmental management	2017
186	Land cover changes in the Lachua region, Guatemala: patterns, proximate causes, and underlying driving forces over the last 50 years	Quezada M L, Arroyo-Rodríguez V, Pérez-Silva E, et al	Regional environmental change	2014
187	Addressing the determinants of built-up expansion and densification processes at the regional scale	Mustafa A, Van Rompaey A, Cools M, et al	Urban studies	2018
188	Analyzing the Impact of Highways Associated with Farmland Loss under Rapid Urbanization	Song J, Ye J, Zhu E, et al	ISPRS International Journal of Geo-Information	2016
189	Changes in landscape structure induced by transportation projects in Cluj-Napoca periurban area using GIS	Corpade C, Man T, Petrea D, et al	Carpathian Journal of Earth and Environmental Sciences	2014
190	Spatial Patterns and Driving Forces of Greenhouse Land Change in Shouguang City, China	Yu B, Song W, Lang Y	Sustainability	2017
191	On the spatiotemporal dynamics of the coupling between land use and road networks: does political history matter?	Chaudhuri G, Clarke K C	Environment and Planning B: Planning and Design	2015
192	Landscape pattern changes under the disturbance of road networks	Fu W, Liu S, Dong S	Procedia Environmental Sciences	2010
193	The Effect of Railway Expansion on Population in Turkey, 1856-2000	Akgüngör S, Aldemir C, Kuştepeli Y, et al	Journal of Interdisciplinary History	2011
194	Simulating urban growth driven by transportation networks: A case study of the Istanbul third bridge	Ayazli I E, Kilic F, Lauf S, et al	Land Use Policy	2015
195	What drives urban growth in China? A multi-scale comparative analysis	Li C, Li J, Wu J	Applied Geography	2018
196	The impact of interstate highways on land use conversion	Mothorpe C, Hanson A, Schnier K	The Annals of regional science	2013
197	Detecting horizontal and vertical urban growth from medium resolution imagery and its relationships with major socioeconomic factors	Zhang W, Li W, Zhang C, et al	International journal of remote sensing	2017
198	A contribution for the evaluation of the territorial impact of transport infrastructures in the early stages of the EIA: application to the Huelva (Spain)-Faro (Portugal) rail link	Ortega E, Martín B, Gonzalez E, et al	Journal of Environmental Planning and Management	2016
199	Exploring the relationship between multilevel highway networks and local development patterns-a case study of Taiwan	Tsou K W, Cheng H T, Tseng F Y	Journal of Transport Geography	2015
200	Patterns of landscape change in a rapidly urbanizing mountain region	Vannier C, Lefebvre J, Longaretti P Y, et al	Cybergeo: European Journal of Geography	2016
201	Urban growth in Indian cities: Are the driving forces really changing?	Abhishek N, Jenamani M, Mahanty B	Habitat International	2017
202	Transit accessibility, land development and socioeconomic priority: A typology of planned station catchment areas in the Greater Toronto and Hamilton Area	Farber S, Marino M G	Journal of Transport and Land Use	2017
203	Spatiotemporal patterns of urban land use change in the rapidly growing city of Lusaka, Zambia: Implications for sustainable urban development	Simwanda M, Murayama Y	Sustainable cities and society	2018
204	Proximate Causes of Land-Use and Land-Cover Change in Bannerghatta National Park: A Spatial Statistical Model	Adhikari S, Fik T, Dwivedi P	Forests	2017
205	Many a little makes a mickle: Cumulative land cover changes and traditional land use in the Kyro reindeer herding district, northern Finland	Kivinen S	Applied Geography	2015
206	Infrastructure development and its influence on agricultural land and regional sustainable development	Bacior S, Prus B	Ecological Informatics	2018
207	Spatiotemporal patterns of urban sprawl and its relationship with economic development in China during 1990-2010	Zhang C, Miao C, Zhang W, et al	Habitat International	2018
208	Impacts of transportation arteries on land use patterns in urban-rural fringe: A comparative gradient analysis of Qixia District, Nanjing City, China	Zhang R, Pu L, Zhu M	Chinese geographical science	2013
209	Temporal Dynamics of the Driving Factors of Urban Landscape Change of Addis Ababa During the Past Three Decades	Zewdie M, Worku H, Bantider A	Environmental management	2018
210	Identification of Factors Influencing Locations of Tree Cover Loss and Gain and Their Spatio-Temporally-Variant Importance in the Li River Basin, China	Zhang Y, Li J, Qin Q	Remote Sensing	2016
211	Hysteresis & Urban Rail	Block-Schachter D, Zhao J	European Journal of Transport and Infrastructure Research	2015
212	Forest Landscape Change and Preliminary Study on Its Driving Forces in la Landscape Park (Southwestern Poland) in 1883-2013	Krajewski P, Solecka I, Mrozik K	Sustainability	2018
213	Does Expressway Consume More Land of the Agricultural Production Base of Shandong Province?	Deng X, Gibson J, Jia S	Computational Economics	2018
214	Physical accessibility and its role in landscape developmentthree historical analyses from South Slovakia	Lieskovský J, Lieskovský T, Piscová V	Landscape research	2017
215	Spatiotemporal Dynamics and Spatial Determinants of Urban Growth in Suzhou, China	Zhang L, Wei Y D, Meng R	Sustainability	2017
216	Cumulative effects of developed road network on woodland-a landscape approach	Vardei M H, Salmanmahiny A, Monavari S M, et al	Environmental monitoring and assessment	2014
217	Development of rail infrastructure and its impact on urbanization in the Randstad, the Netherlands	Kasraian D, Maat K, van Wee B	Journal of Transport and Land Use	2016
218	Socioecological system and potential deforestation in Western Amazon forest landscapes	Bonilla-Bedoya S, Estrella-Bastidas A, Molina J R, et al	Science of the total environment	2018
219	Urban and industrial land-use changes alongside motorways within the Pyrenean area of Navarre, Spain	Villarroya A, Puig J	Environmental Engineering & Management Journal	2012
220	Scale-Free Relationships between Social and Landscape Factors in Urban Systems	Wei C, Padgham M, Cabrera Barona P, et al	Sustainability	2017
221	Mind the missing links in China's urbanizing landscape: The phenomenon of broken intercity trunk roads and its underpinnings	Liu X, Zhou J	Landscape and Urban Planning	2017
222	Project-level accessibility analysis for land-use planning	Levine J, Merlin L, Grengs J	Transport Policy	2017
223	Land use/transport integration: Starting at the right place	Stanley J K	Research in Transportation Economics	2014
224	Spatial and Temporal Characteristics of Road Networks and Urban Expansion	Zhao G, Zheng X, Yuan Z, et al	Land	2017
225	Urbanisation-related Landscape Change in Space and Time along Spatial Gradients near Roads: A Case Study from Estonia	Reimets R, Uuemaa E, Oja T, et al	Landscape Researc	2015
226	Future European agricultural landscapes - What can we learn from existing quantitative land use scenario studies?	Busch G	Agriculture, Ecosystems & Environment	2006
227	Simulating and Predicting the Impacts of Light Rail Transit Systems on Urban Land Use by Using Cellular Automata: A Case Study of Dongguan, China	Lin J, Chen T, Han Q	Sustainability	2018
228	Quantitative Analysis of the Determinants Influencing Urban Expansion: A Case Study in Beijing, China	Xu Q, Zheng X, Zhang C	Sustainability	2018
229	Transit-oriented development's ridership bonus: a product of self-selection and public policies	Cervero R	Environment and planning A	2007
230	Spatiotemporally Varying Relationships between Urban Growth Patterns and Driving Factors in Xuzhou City, China	Li C, Thinh N X, Zhao J	Photogrammetrie-Fernerkundung-Geoinformation	2014
231	Railways and Population Distribution: France, Spain, and Portugal, 1870-2000	Mojica L, Martí-Henneberg J	Journal of Interdisciplinary History	2011
232	Sustainable urban development in China: challenges and achievements	Wang J, He D	Mitigation and adaptation strategies for global change	2015
233	An accessibility approach to railways and municipal population growth, 1840-1930	Koopmans C, Rietveld P, Huijg A	Journal of Transport Geography	2012
234	An ecosystem service valuation of land use change in Taiyuan City, China	Liu Y, Li J, Zhang H	Ecological Modelling	2012
235	The determinants of local population growth: A study of Oxfordshire in the nineteenth century	Casson M	Explorations in Economic History	2013
236	How streetcars shaped suburbanization: a Granger causality analysis of land use and transit in the Twin Cities	Xie F, Levinson D	Journal of Economic Geography	2010
237	This is what we did last time. Uncertainty over landscape analysis and its procurement in the Swedish road planning process	Antonson H, Åkerskog A	Land use policy	2015
238	How do modern transportation projects impact on development of impervious surfaces via new urban area and urban intensification? Evidence from Hangzhou Bay Bridge, China	Shahtahmassebi A R, Wu C, Blackburn G A, et al	Land use policy	2018
239	Did highways cause suburbanization?	Baum-Snow N	The quarterly journal of economics	2007
240	Changing minor rural road networks in relation to landscape sustainability and farming practices in West Europe	Pauwels F, Gulinck H	Agriculture, ecosystems & environment	2000
241	Road Centrality and Urban Landscape Patterns in Wuhan City, China	Yin C, Liu Y, Wei X, et al	Journal of Urban Planning and Development	2018
242	A review of geospatial-based urban growth models and modelling initiatives	Musa S I, Hashim M, Reba M N M	Geocarto International	2017
243	Relationships of Agricultural Land Use to an Expanded Road Network within Tropical Forest Landscapes of Cameroon and Republic of the Congo	Cordero-Sancho S, Bergen K M	The Professional Geographer	2018
244	Road ecology: Science and solutions	Forman R T T, Sperling D, Bissonette J A, et al	Island press	2003
245	A Multivariate Approach to Study Drivers of Land-Cover Changes through Remote Sensing in the Dry Chaco of Argentina	Hoyos L E, Cabido M R, Cingolani A M	ISPRS International Journal of Geo-Information	2018
246	Characterizing the hierarchy of road network and its landscape effect with graph theory	Liu S, Dong Y	The 7th International Symposium on Operations Research and Its Applications	2008
247	Population and Railways in Portugal, 1801-1930	Da Silveira L E, Alves D, Lima N M, et al	Journal of Interdisciplinary History	2011
248	Accessibility, Demography and Protection: Drivers of Forest Stability and Change at Multiple Scales in the Cauvery Basin, India	Lele N, Nagendra H, Southworth J	Remote Sensing	2010
249	Thirty-year expansion of construction land in Xi'an: Spatial pattern and potential driving factors	Wang X, Xiao F, Zhang Y, et al	Geological Journal	2018
250	LANDSCAPE FRAGMENTATION CAUSED BY TRAFFIC IN THE CZECH REPUBLIC: EVOLUTION FROM THE YEAR 1980 AND THE PROGNOSIS TILL 2040	Petrzílk L, Gorcicová I, Belková H	International Multidisciplinary Scientific GeoConference: SGEM: Surveying Geology & mining Ecology Management	2010
251	Evolution of Subway Network Systems, Subway Accessibility, and Change of Urban Landscape: A Longitudinal Approach to Seoul Metropolitan Area	Song Y, Kim H	International Journal of Applied Geospatial Research	2015
252	Exploring the driving forces of farmland loss under rapidurbanization using binary logistic regression and spatial regression: A case study of Shanghai and Hangzhou Bay	Xiao R, Liu Y, Huang X, et al	Ecological Indicators	2018
253	Driving Forces of Landscape Fragmentation due to Urban Transportation Networks: Lessons from Fujian, China	Luo T, Zhang T, Wang Z, et a	Journal of Urban Planning and Development	2016
254	Roads and Rural Development in Sub-Saharan Africa	Berg C N, Blankespoor B, Selod H	The Journal of Development Studies	2018
255	Did Railroads Induce or Follow Economic Growth? Urbanization and Population Growth in the American Midwest, 1850-1860	Atack J, Bateman F, Haines M, et al	Social Science History	2010
256	Urban Land-Use Transport Interaction modelling: state of the art and applications	Russo F, Musolino G	WIT Transactions on The Built Environment	2007
257	Exploring impacts on environment: of road transportation a spatial approach	Demirel H, Sertel E, Kaya S, et al	Desalination	2008
258	Land use changes, landslides and roads in the Phewa Watershed, Western Nepal from 1979 to 2016	Vuillez C, Tonini M, Sudmeier-Rieux K, et al	Applied geography	2018
259	Spatial driving forces of dominant land use/land cover transformations in the Dongjiang River watershed, Southern China	Gao C, Zhou P, Jia P, et al	Environmental monitoring and assessment	2016
260	From accessibility improvement to land development: a comparative study on the impacts of Madrid-Seville high-speed rail	Shen Y, Zhao J, de Abreu e Silva J, et al	Transportation Letters	2017
261	Spatial, Temporal and Hierarchical Variability of the Factors Driving Urban Growth: A Case Study of the Treasure Valley of Idaho, USA	Dahal K, Lindquist E. Spatial	Applied Spatial Analysis and Policy	2018
262	Correlation between Transit-Oriented Development (TOD), Land Use Catchment Areas, and Local Environmental Transformation	Tong X, Wang Y, Chan E H W, et al	Sustainability	2018
263	Integration of historical map and aerial imagery to characterize long-term land-use change and landscape dynamics: An object-based analysis via Random Forests	Liu D, Toman E, Fuller Z, et al	Ecological Indicators	2018
264	Urban land expansion and its driving factors of mountain cities in China during 1990-2015	Wang Z, Lu C	Journal of Geographical Sciences	2018
265	Modelling Developed Land in Phuket Province of Thailand: 2000-2009	Chuangchang P, Sangkhaduang T, Tongkumchum P	Pertanika Journal of Social Sciences & Humanities	2016
266	Analysis of road development and associated agricultural land use change	Alphan H	Environmental monitoring and assessment	2018
267	Outdoor Activities and Urbanization: A Constant Bridging Throughout the Twentieth Century in France	Schut P O	The International Journal of the History of Sport	2017
268	Modelling urban growth over time using grid-digitized method with variance inflation factors applied to spatial correlation	Chuangchang P, Thinnukool O, Tongkumchum P	Arabian Journal of Geosciences	2016
269	Effect of linear investment on nature and landscape–a case study	Lisiak M, Borowiak K, Kanclerz J, et al	Journal of Environmental Engineering and Landscape Management	2018
270	Patterns and Determinants of Post-Soviet Cropland Abandonment in the Western Siberian Grain Belt	Nguyen H, Hölzel N, Völker A, et al	Remote Sensing	2018
271	Analysis of the Dynamic Urban Expansion Based on Multi-Sourced Data from 1998 to 2013: A Case Study of Jiangsu Province	Shi G, Jiang N, Li Y, et al	Sustainability	2018
272	Exploring the Factors Driving Changes in Farmland within the Tumen/Tuman River Basin	Kang C, Zhang Y, Paudel B, et al	ISPRS International Journal of Geo-Information	2018
273	Urban Expansion and Farmland Loss in Beijing during 1980-2015	Hu Y, Kong X, Zheng J, et al	Sustainability	2018
274	Measuring land fragmentation considering the shape of transportation network: A method to increase the accuracy of modeling the spatial structure of agriculture with case study in Poland	Janus J	Computers and Electronics in Agriculture	2018
275	Investigating the impact of road network development on land cover change in Lijiang River Basin	Xu R, Qin Q, Lin C, et al	IEEE Geoscience and Remote Sensing Symposium	2014
276	Land-Use Spatio-Temporal Change and Its Driving Factors in an Artificial Forest Area in Southwest China	Zhao X, Pu J, Wang X, et al	Sustainability	2018
277	Forest Fragmentation and Driving Forces in Yingkou, Northeastern China	Zhang L, Liu Y, Wei X	Sustainability	2017
278	Modeling Urban Spatial Growth in Mountainous Regions of Western China	Huang G	Mountain Research and Development	2017
279	Consequences of an Improved Road Network in Rural Iran: Does it Lead to Better Livelihoods and Forest Protection?	Soltani A, Sankhayan P L, Hofstad O, et al	Small-scale Forestry	2017
280	Measurement of Ecological Land Use/Cover Change and Its Varying Spatiotemporal Driving Forces by Statistical and Survival Analysis: A Case Study of Yingkou City, China	Zhang L, Jin G, Wan Q, et al	Sustainability	2018
281	Urban Form, Growth, and Accessibility in Space and Time: Anatomy of Land Use at the Parcel-Level in a Small to Medium-Sized American City	Zhou L, Shen G, Wu Y, et al	Sustainability	2018
282	Exploring the relationship between spatial driving forces of urban expansion and socioeconomic segregation: The case of Shiraz	Azhdari A, Sasani M A, Soltani A	Habitat International	2018
283	Land use and land cover changes in small Carpathian catchments between the mid-19(th) and early 21(st) centuries and their record on the land surface	Kroczak R, Fidelus-Orzechowska J, Bucała-Hrabia A, et al	Journal of Mountain Science	2018
284	Relative improvements in road mobility as compared to improvements in road accessibility and urban growth: A panel data analysis	Ng C P, Law T H, Jakarni F M, et al	Transportation Research Part A: Policy and Practice	2018
285	The potential impact of economic policies on future land-use conversions in Argentina	Piquer-Rodríguez M, Baumann M, Butsic V, et a	Land use policy	2018
286	Study of the relationship between roads, relief, land use, and natural vegetation in the Ibiuna Plateau - SP, focusing on landscape ecology	Freitas S R, Teixeira A M G, Metzger J P	NATUREZA & CONSERVAÇÃO	2009
